# Supplementary material for: Antibody-dependent enhancement representing in vitro infective progeny virus titer correlates with the viremia level in dengue patients
Source: PubMed Central journal article supplement (PMC8196181; doi:10.1038/s41598-021-91793-0), 2021-06-11
Supplement: 41598_2021_91793_MOESM1_ESM.pdf [file 41598_2021_91793_MOESM1_ESM.pdf]

**Antibody-dependent enhancement representing *in vitro* infective progeny virus titer correlates with the viremia level in dengue patients**

Atsushi Yamanaka,<sup>1,2,\*</sup> Hisham Ahmed Imad,<sup>3</sup> Weerapong Phumratanaprapin,<sup>3</sup> Juthamas Phadungsombat,<sup>1</sup> Eiji Konishi,<sup>4</sup> and Tatsuo Shioda<sup>1,2,5</sup>

<sup>1</sup>*Mahidol-Osaka Center for Infectious Diseases, Faculty of Tropical Medicine, Mahidol University, 420/6 Ratchawithi Road, Ratchathewi, Bangkok 10400, Thailand.*

<sup>2</sup>*Mahidol-Osaka Center for Infectious Diseases, Research Institute for Microbial Diseases, Osaka University, 3-1 Yamada-oka, Suita, Osaka 565-0871, Japan.*

<sup>3</sup>*Department of Clinical Tropical Medicine, Faculty of Tropical Medicine, Mahidol University, 420/6 Ratchawithi Road, Ratchathewi, Bangkok 10400, Thailand.*

<sup>4</sup>*BIKEN Endowed Department of Dengue Vaccine Development, Faculty of Tropical Medicine, Mahidol University, 420/6 Ratchawithi Road, Ratchathewi, Bangkok 10400, Thailand.*

<sup>5</sup>*Department of Viral Infections, Research Institute for Microbial Diseases, Osaka University, 3-1 Yamada-oka, Suita, Osaka 565-0871, Japan.*

**Supplementary Table S1.** ELISA antibody titers against the autologous virus

|                   | hours | Patient ID         |           |           |           |           |           |
|-------------------|-------|--------------------|-----------|-----------|-----------|-----------|-----------|
|                   |       | D1-14              | D2-44     | D2-57     | D3-46     | D4-12     | D4-49     |
|                   | 24    | -                  | -         | 1:100     | -         | -         | -         |
|                   | 39    | -                  | -         | 1:200     | -         | -         | -         |
|                   | 63    | -                  | -         | 1:200     | -         | -         | -         |
|                   | 72    | 1:100 <sup>a</sup> | 1:200     | -         | -         | 1:400     | 1:40      |
|                   | 84    | -                  | 1:800     | -         | -         | -         | -         |
| Period            | 85    | 1:100              | -         | -         | -         | -         | -         |
| after             | 86    | -                  | -         | -         | -         | 1:800     | -         |
| fever             | 87    | -                  | -         | 1:400     | -         | -         | -         |
| onset             | 89    | -                  | -         | -         | -         | -         | 1:80      |
|                   | 96    | -                  | -         | -         | 1:12,800  | -         | -         |
|                   | 98    | -                  | -         | -         | -         | 1:800     | -         |
|                   | 108   | -                  | 1:1,600   | -         | -         | -         | -         |
|                   | 113   | -                  | -         | -         | -         | -         | 1:320     |
|                   | 115   | -                  | -         | -         | 1:25,600  | -         | -         |
|                   | 132   | -                  | 1:1,600   | -         | -         | -         | -         |
|                   | 137   | -                  | -         | -         | -         | -         | 1:2,560   |
| Infection history |       | Primary            | Secondary | Secondary | Secondary | Secondary | Secondary |

<sup>a</sup>The end-point titer was expressed as the maximum serum dilution that displayed an optic density (OD) value of  $\geq 0.3$ .

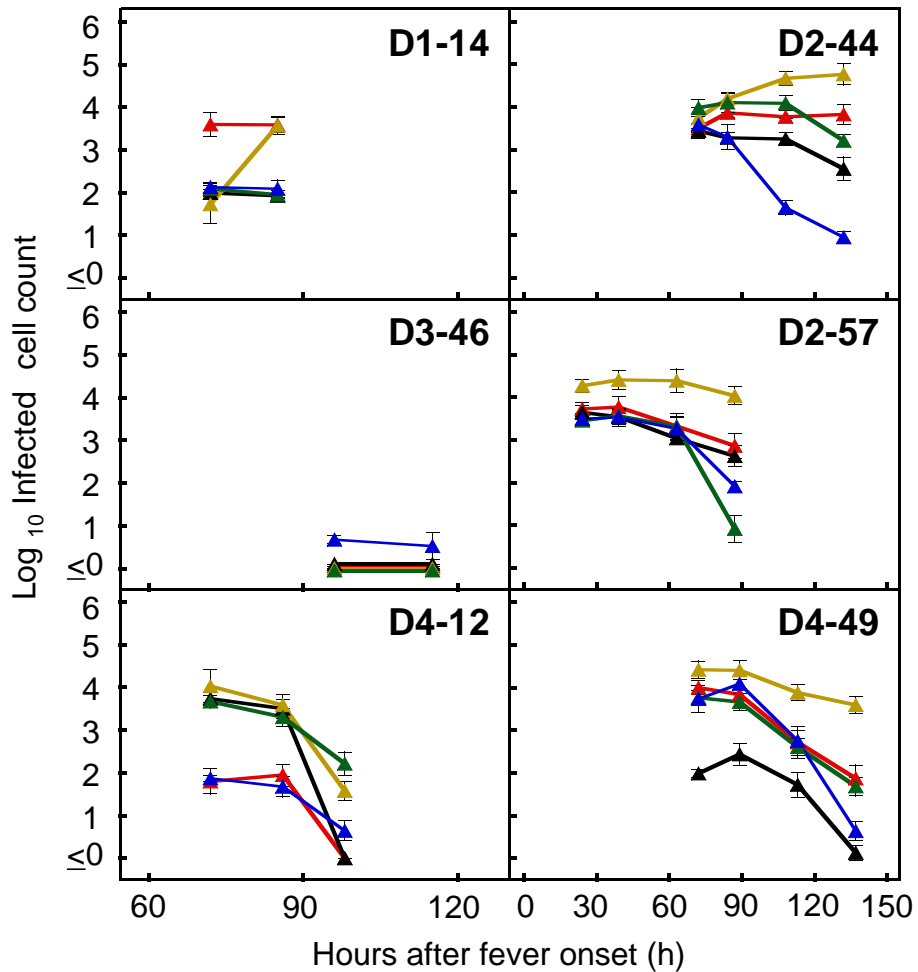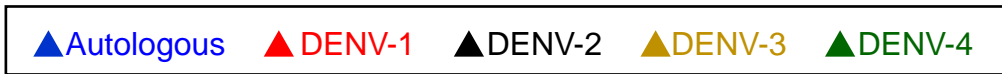

**Supplementary Figure S1.** Transition of the NAb/EAb balance activity in a low serum dilution (1:10) with time progression. The infected cell counts (specifying data at 1:10 serum dilution) obtained from Figs. 1B and 2 were plotted as the ordinate (expressed as log<sub>10</sub>) against time (h) as the abscissa.

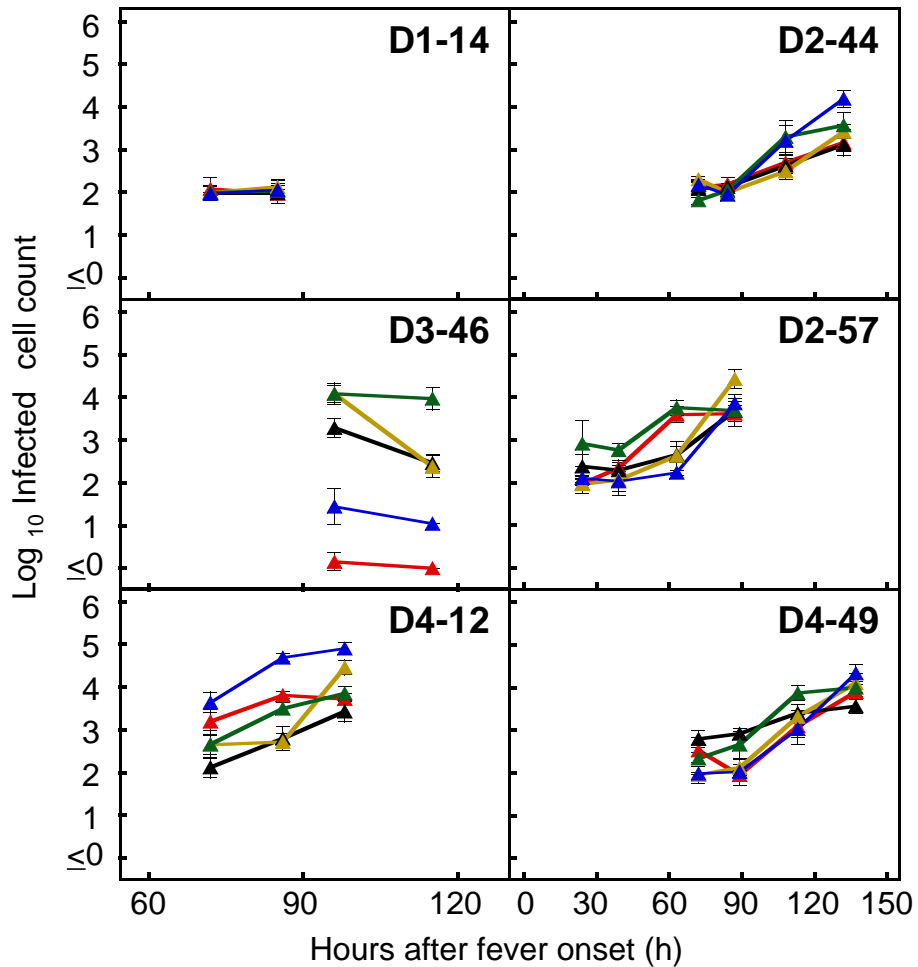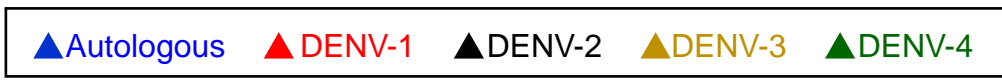

**Supplementary Figure S2.** Transition of the NAb/EAb balance activity in a high serum dilution (1:2560) with time progression. The infected cell counts (specifying data at 1:2560 serum dilution) obtained from Figs. 1B and 2 were plotted as the ordinate (expressed as  $\text{log}_{10}$ ), and plotted with time (h) as the abscissa.
